# Supplementary material for: Metal complex-based multi-stimuli responsive amphiphiles: development into monolayers and giant vesicles
Source: Royal Society of Chemistry journal article supplement (doi:10.1039/d4nj03480e), 2024-01-01
Supplement: d4nj03480e1.pdf [file d4nj03480e1.pdf]

## Supporting Information for

# Metal Complexes Based Multi-Stimuli Responsive Amphiphile: Development into Monolayers and Giant Vesicles

Zen Matsuhita,<sup>a</sup> Hiroki Goto,<sup>b</sup> Mio Tamada,<sup>a</sup> Atsuki Maeda,<sup>a</sup> Yasushi Umemura,<sup>b</sup> and  
Masanari Hirahara\*<sup>a</sup>

<sup>a</sup> Department of Applied Chemistry, Faculty of Engineering, Osaka Institute of Technology, 5-16-1  
Omiya, Asahi-ku, Osaka 535-8585, Japan

<sup>b</sup> Department of Applied Chemistry, School of Applied Science, National Defense Academy of Japan,  
1-10-20 Hashirimizu, Yokosuka, Kanagawa 239-8686, Japan

## Supporting Information

### Contents

|                                                                                                         |     |
|---------------------------------------------------------------------------------------------------------|-----|
| Figure S1—Top and side views of <i>p-1</i> and <i>d-1</i> .                                             | S2  |
| Figure S2—Absorption spectral changes of <i>p-1</i> /DOPC vesicles under light irradiation.             | S3  |
| Figure S3—Absorption spectral changes of <i>p-1</i> in mixed aqueous solutions under light irradiation. | S4  |
| Figure S4— <sup>1</sup> H NMR spectral changes of <i>p-1</i> under light irradiation.                   | S5  |
| Figure S5— <sup>1</sup> H NMR spectral changes of <i>p-1</i> and <i>d-1</i> under heating in the dark.  | S5  |
| Figure S6—Time laps <i>p-1</i> /DOPC under visible light irradiation and heating in the dark.           | S6  |
| Figure S7—DSC and DDSC plots for <i>p-1</i> /DOPC.                                                      | S7  |
| Figure S8—DSC and DDSC plots for <i>p-1</i> /DOPC/DMPC (DOPC:DMPC = 1:3).                               | S8  |
| Figure S9—DSC and DDSC plots for DOPC vesicles.                                                         | S9  |
| Figure S10—DSC and DDSC plots for DMPC vesicles                                                         | S10 |

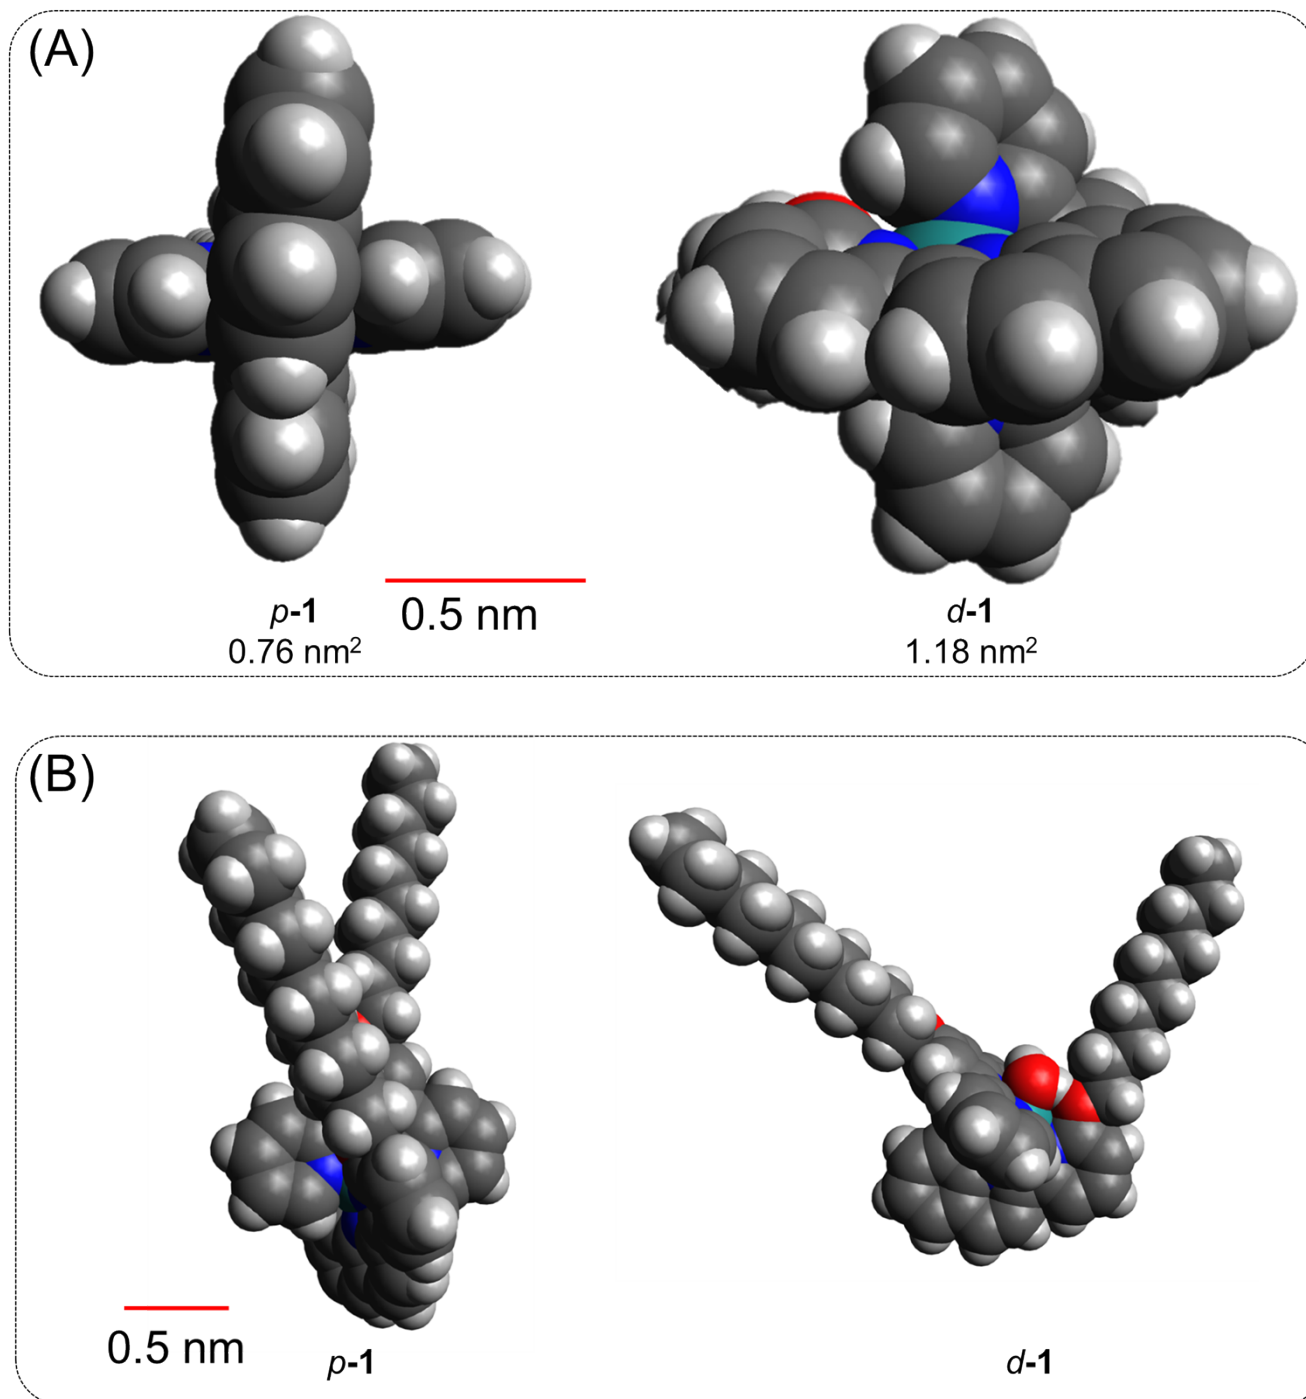

**Figure S1.** (A) Top and (B) side views of  $p-1$  and  $d-1$ . The geometry of complexes were optimized DFT calculation (B3LYP, LANL2DZ).

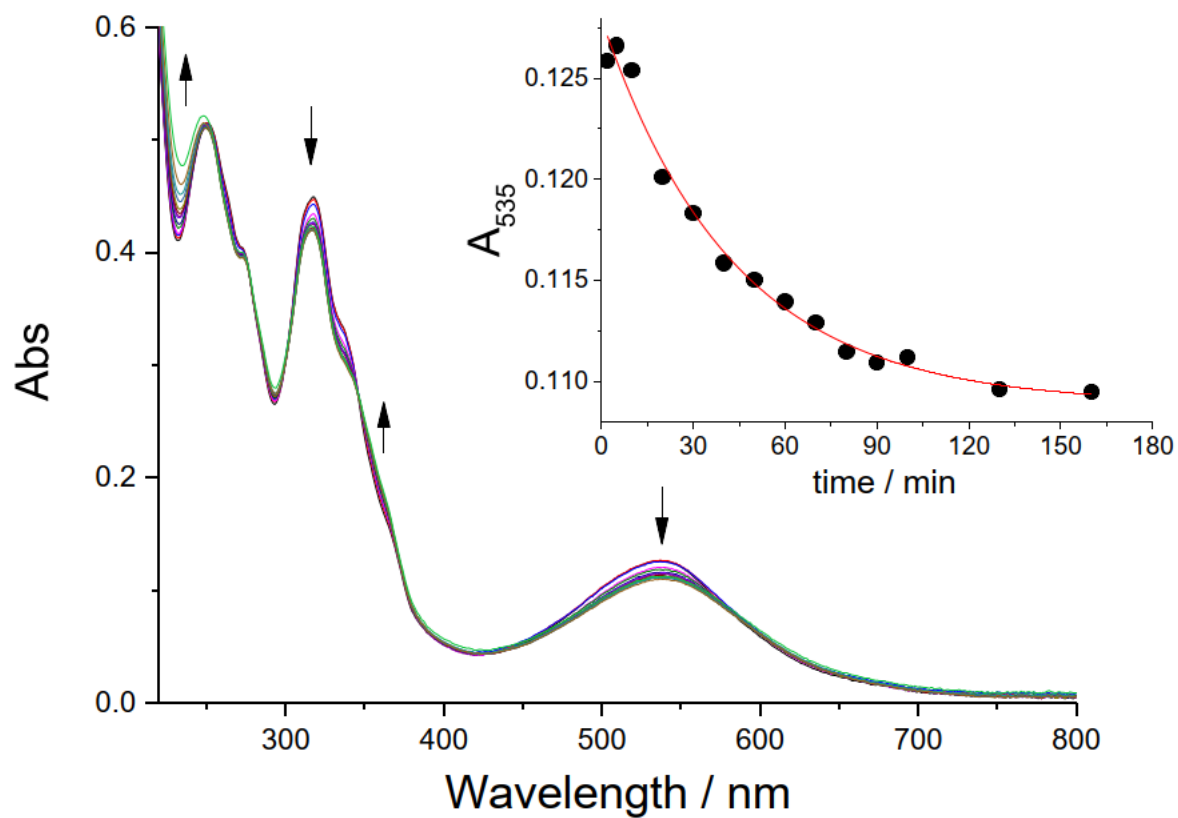

**Figure S2.** UV-Vis absorption spectral change of a vesicle dispersion containing *p*-1 (40 nmol), DOPC (200 nmol), and water (0.4 mL) under light irradiation with a 100 W halogen lamp ( $\lambda > 380$  nm, 70 mW cm<sup>-2</sup>).

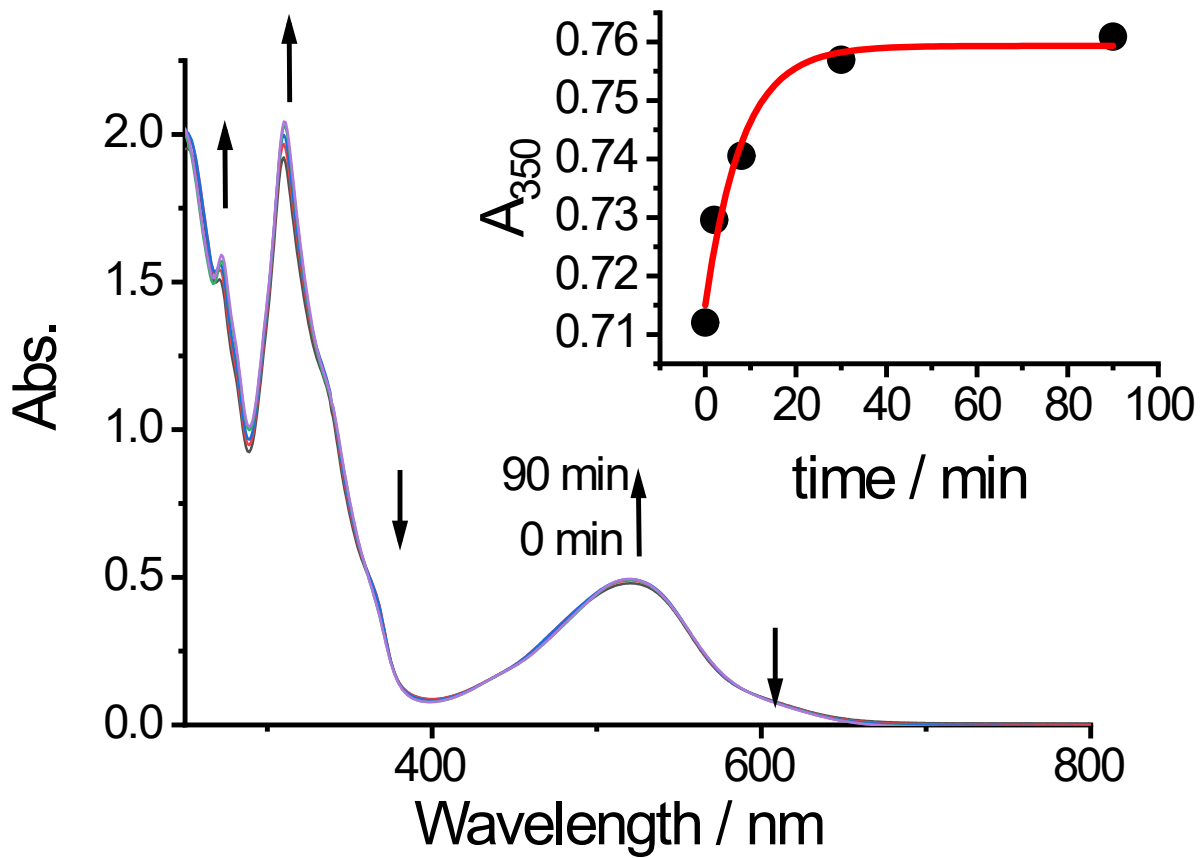

**Figure S3.** UV-Vis absorption spectral change of a *p*-1 in mixed aqueous solution (MeOH:H<sub>2</sub>O = 2:3) under light irradiation with a 100 W halogen lamp ( $\lambda > 380$  nm, 70 mW cm<sup>-2</sup>).

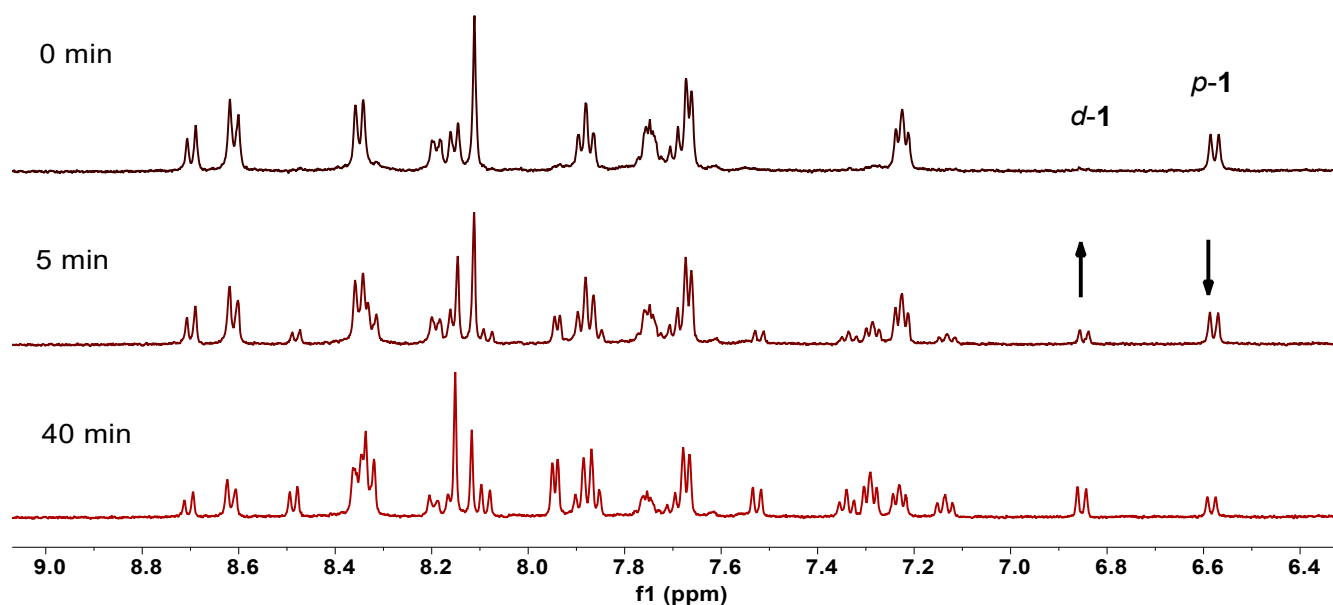

**Figure S4.**  $^1\text{H}$  NMR spectra of *p*-1 (1.1 mM) in a mixed aqueous solution ( $\text{D}_2\text{O}/\text{CD}_3\text{OD}/d$ -acetone = 4:2:1) under light irradiation with a 100 W halogen lamp ( $\lambda > 380$  nm,  $70$  mW  $\text{cm}^{-2}$ ).

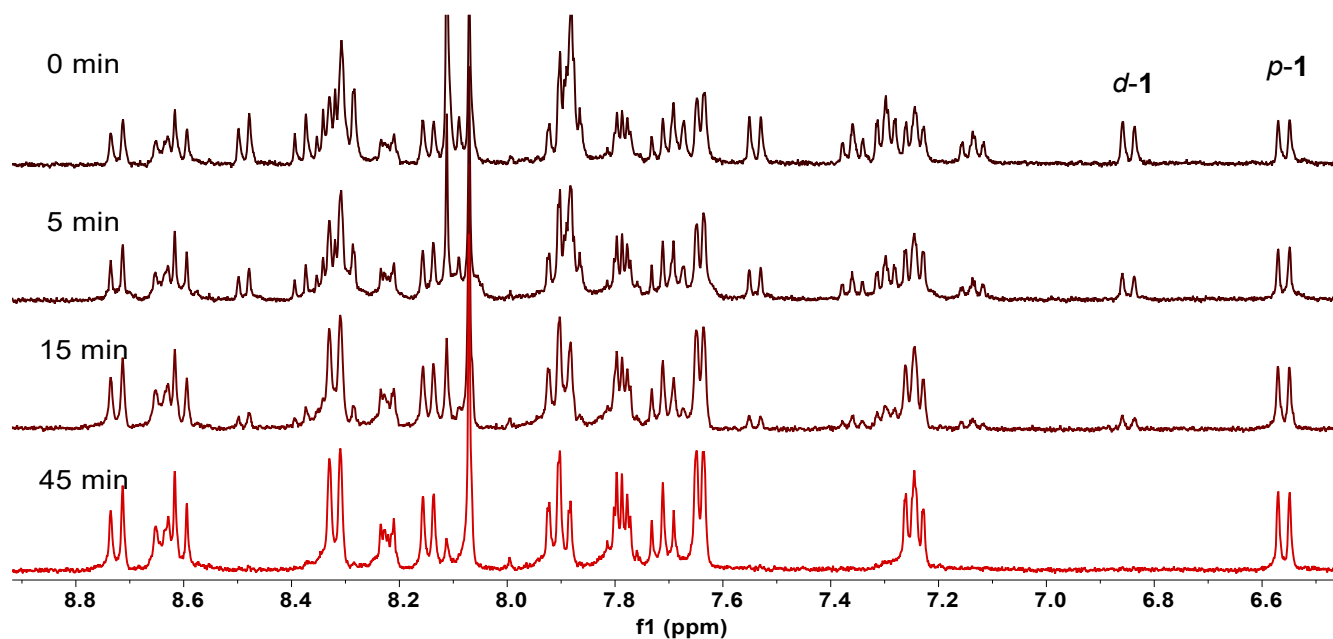

**Figure S5.**  $^1\text{H}$  NMR spectra during thermal back isomerization from *d*-1 to *p*-1 at 293 K. The sample solution was prepared by light irradiation to an aqueous solution of *p*-1 (1.5 mM) in mixed aqueous solution ( $\text{D}_2\text{O} : \text{CD}_3\text{OD} : \text{TFE} = 70 : 50 : 2$ ).

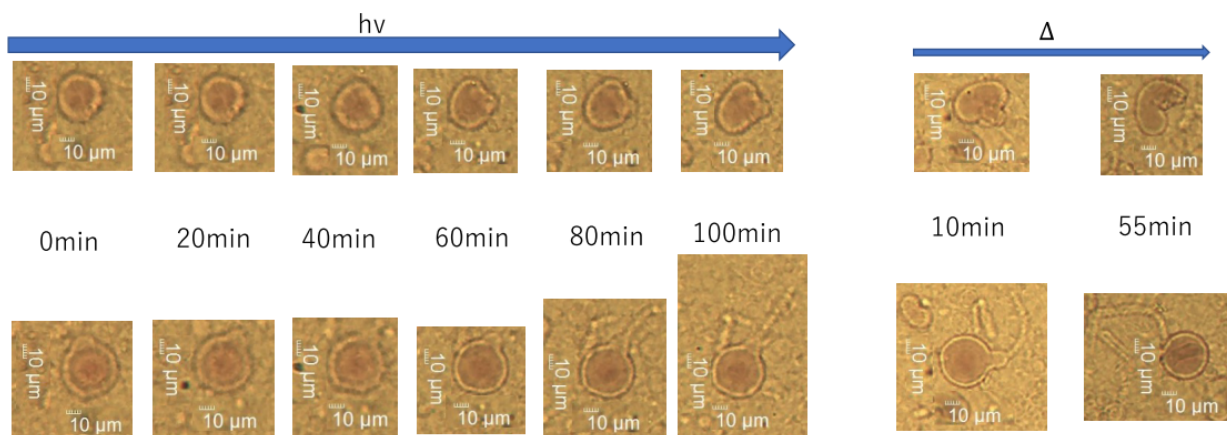

**Figure S6.** Time laps of distortion and fission of MLVs of *p-1*/DOPC under visible light irradiation and heating in the dark.

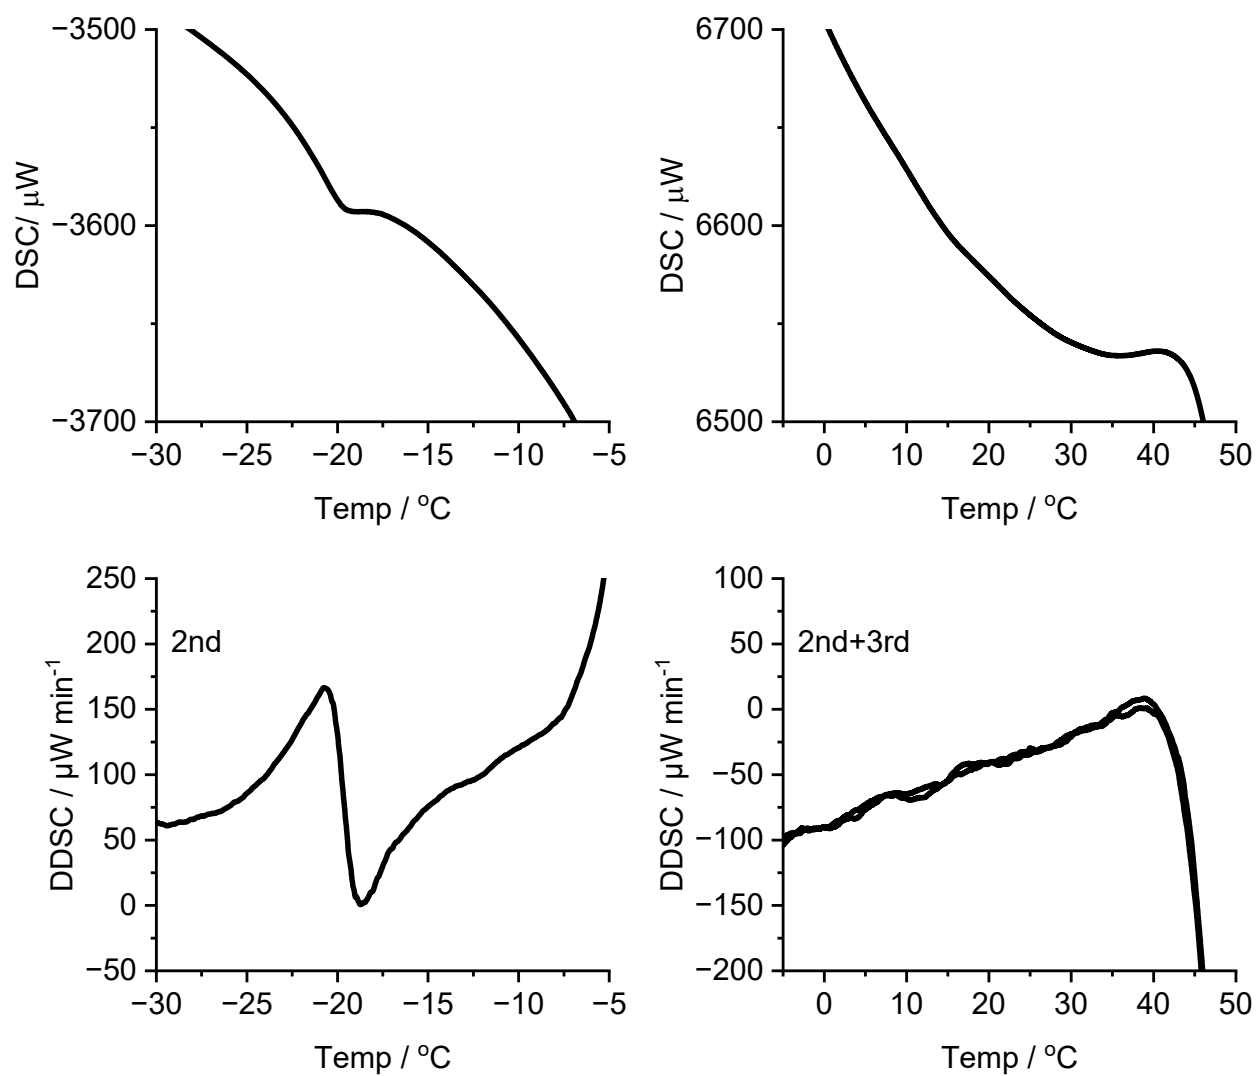

**Figure S7.** DSC and DDSC plots for *p*-1/DOPC.

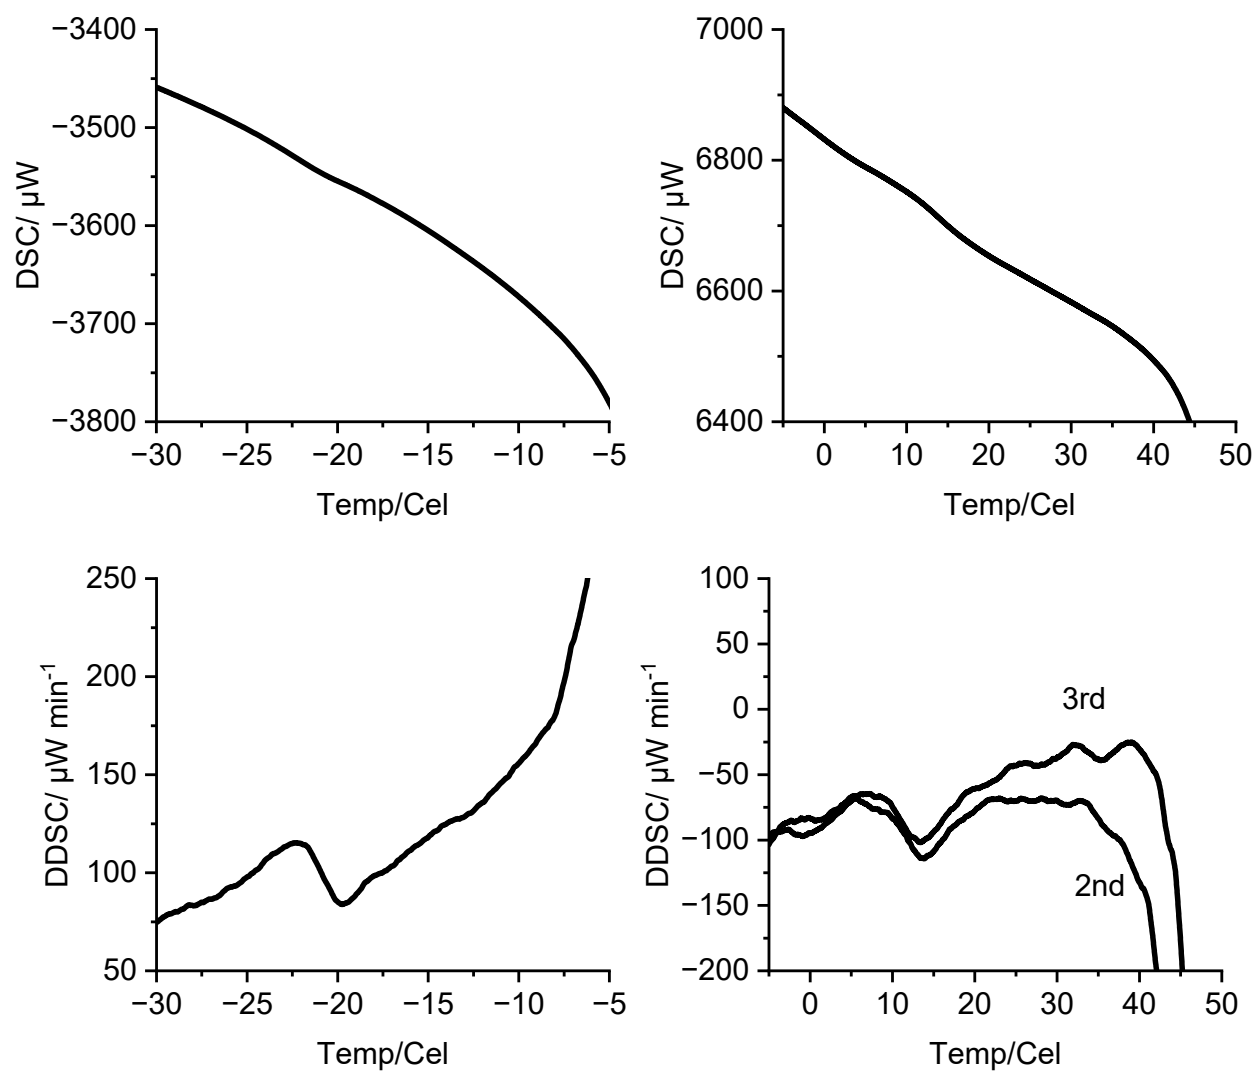

**Figure S8.** DSC and DDSC plots for *p*-1/DOPC/DMPC (DOPC:DMPC = 1:3).



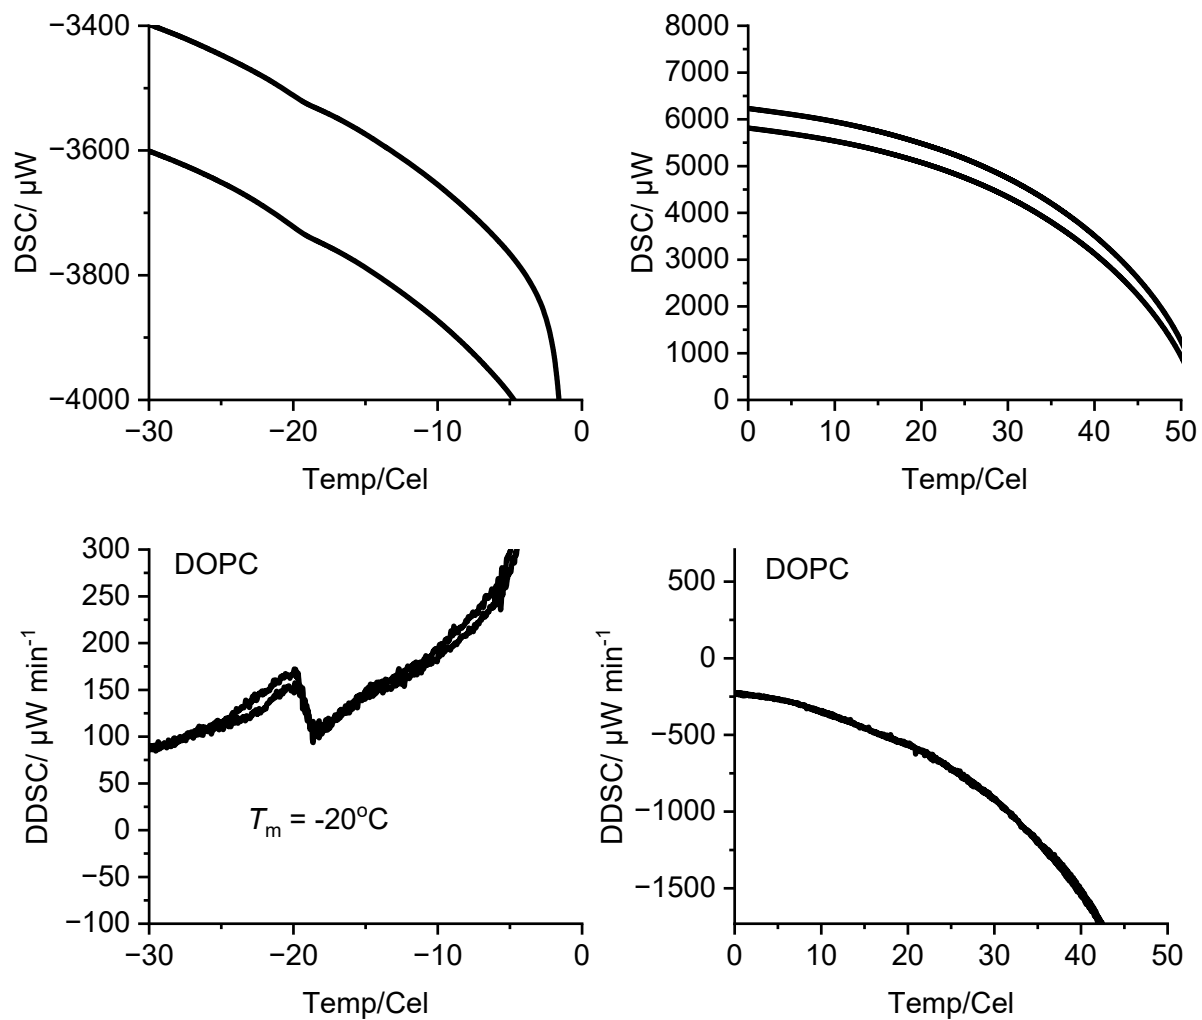

**Figure S9.** DSC and DDSC plots for DOPC vesicles (1 mM).

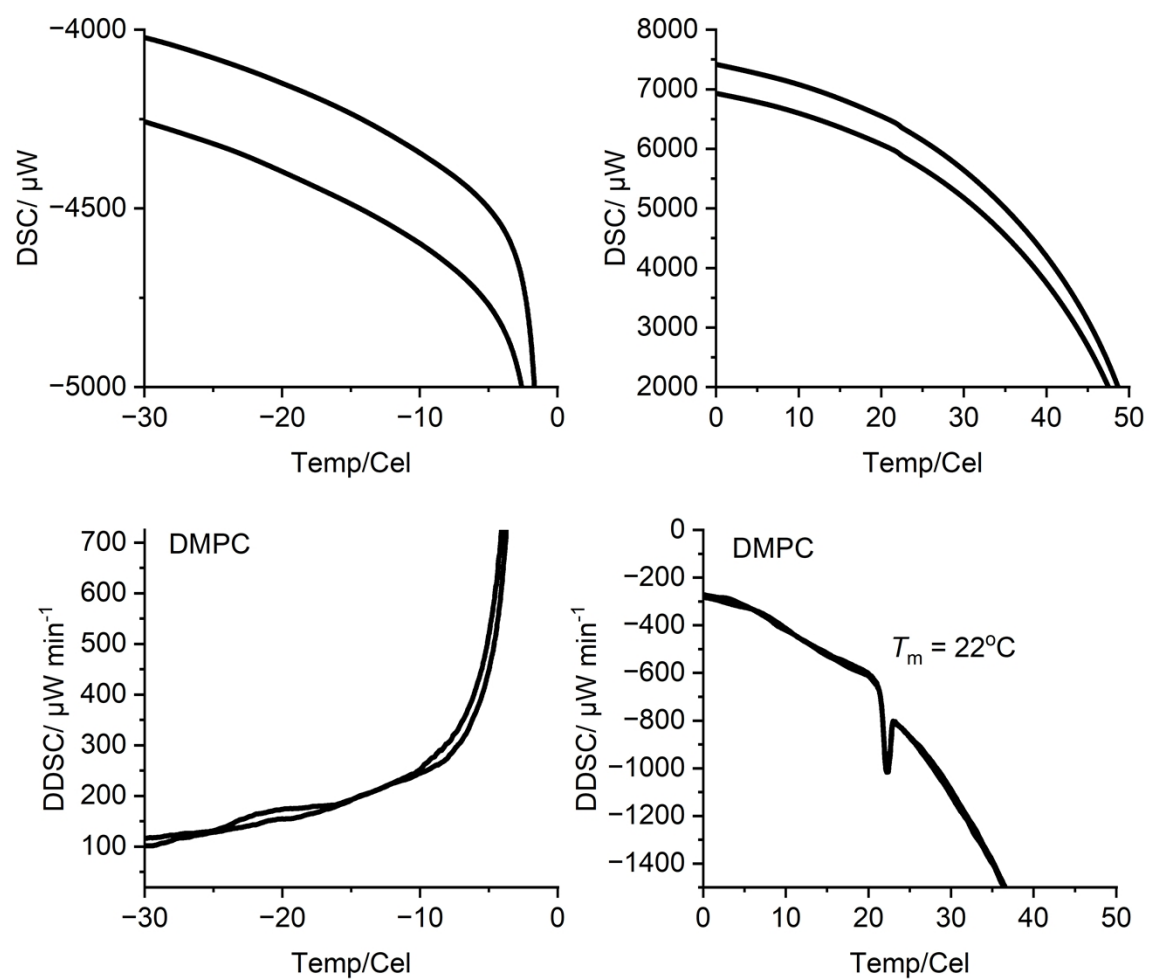

**Figure S10.** DSC and DDSC plots for DMPC vesicles (1 mM).
